# Supplementary material for: Enhanced performance of phase change memory by grain size reduction
Source: Royal Society of Chemistry journal article supplement (doi:10.1039/d1tc06045g), 2022-01-01
Supplement: d1tc06045g1.pdf [file d1tc06045g1.pdf]

## Supporting Information

## Enhanced performance of phase change memory by grain size reduction

*Yuan Xue\**, *Sannian Song\**, *Xiaogang Chen*, *Shuai Yan*, *Shilong Lv*, *Tianjiao Xin*,  
*Zhitang Song\**

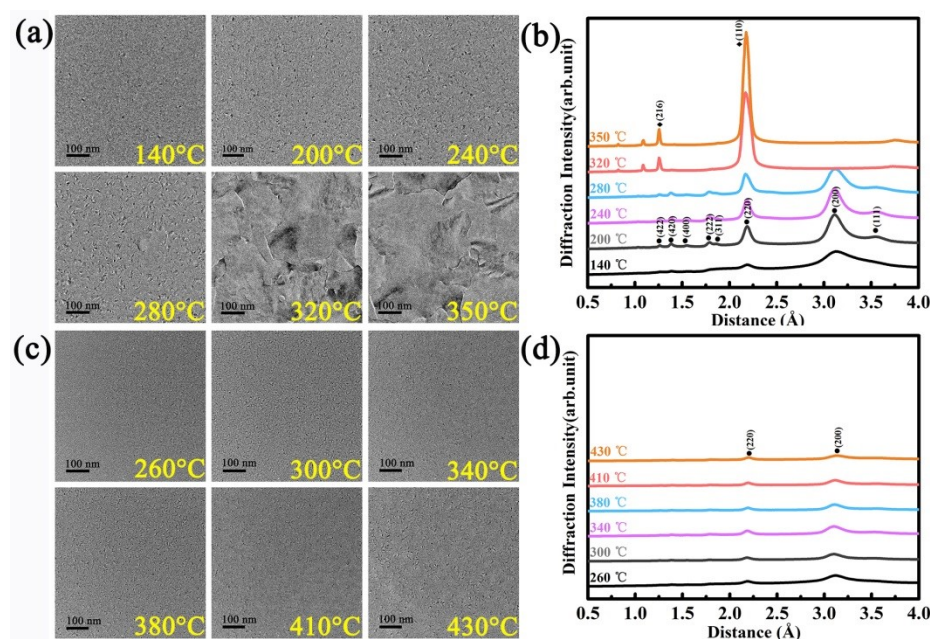

**Figure S1.** BF TEM images and the raw integrated diffraction curves of electronic diffraction intensity extracted from the respective SAED patterns for (a)-(b) GST and (c)-(d) TaGST films.

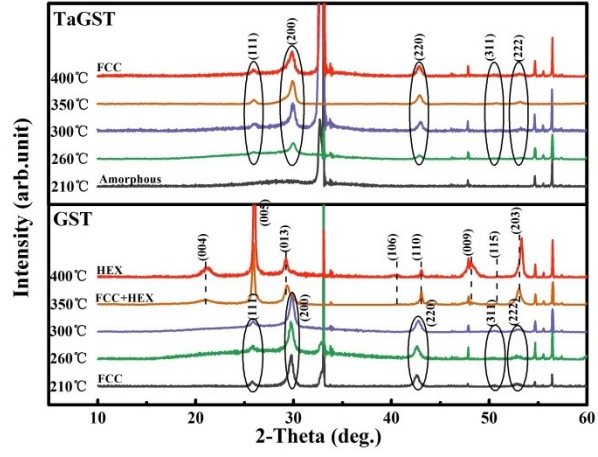

**Figure S2.** In-situ XRD results for GST and TaGST films.

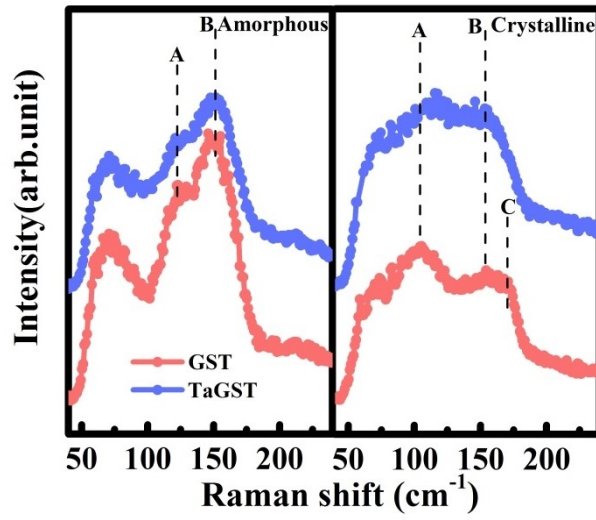

**Figure S3.** Raman spectra for amorphous and crystalline GST and TaGST films.

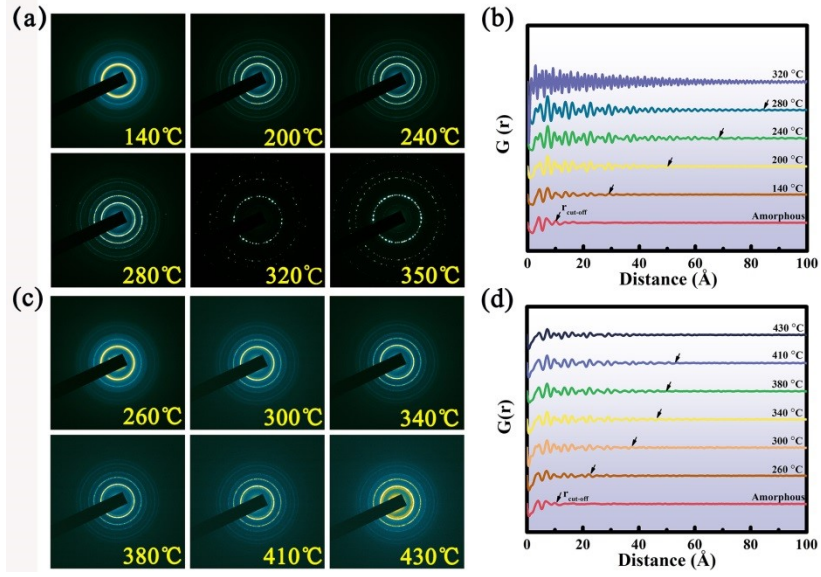

**Figure S4.** Evolution of selected area electron diffraction patterns and the corresponding real-time radial distribution function  $G(r)$  curves of (a)-(b) GST and (c)-(d) TaGST at  $r$  ranging from 2 to 100 Å.

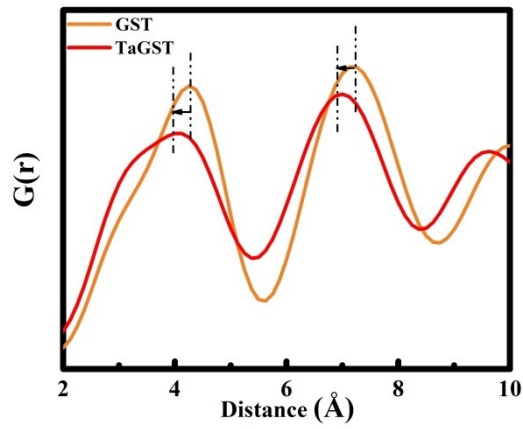

**Figure S5.** Evolution of real-time radial distribution function  $G(r)$  curves at  $r$  ranging from 2 to 10 Å for as-deposited films.

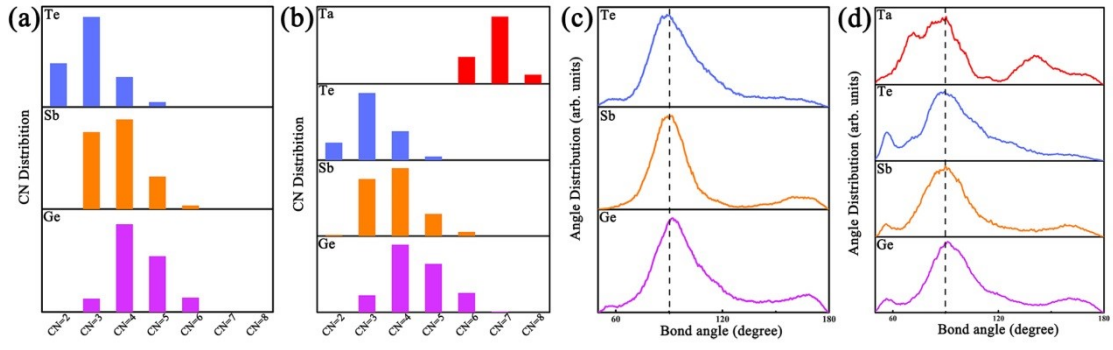

**Figure S6.** (a)-(b) Coordination number distribution and (c)-(d) the bond angle distribution of Ge, Sb, Te and Ta for amorphous GST and TaGST.

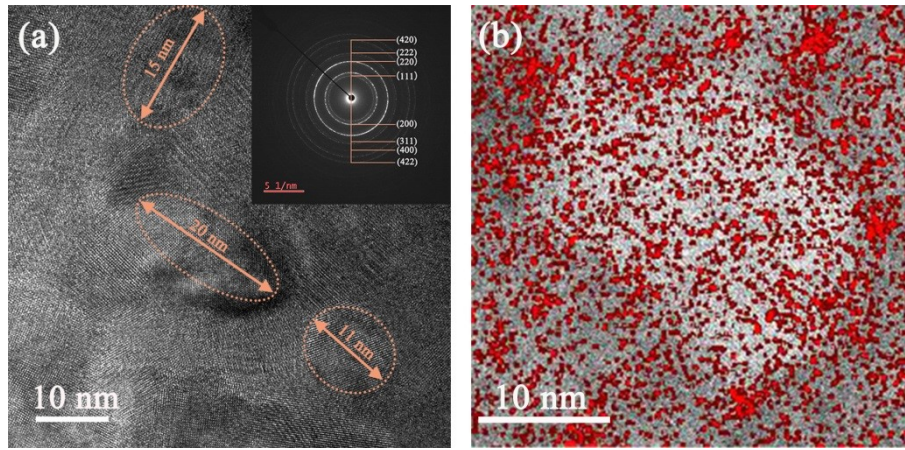

**Figure S7.** (a) HRTEM image of TaGST film after 400 °C for 20 min. (b) Ta element is distributed in a complete grain of TaGST film after annealed at 400 °C for 20 min.

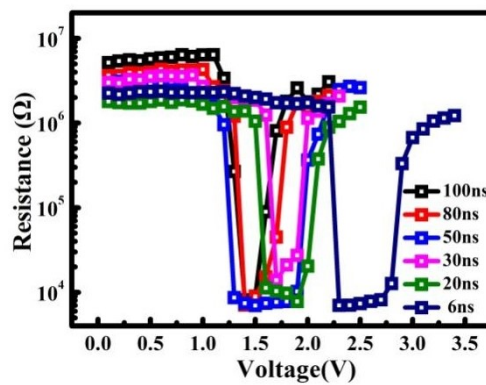

**Figure S8.** The R-V of the device based on TaGST.

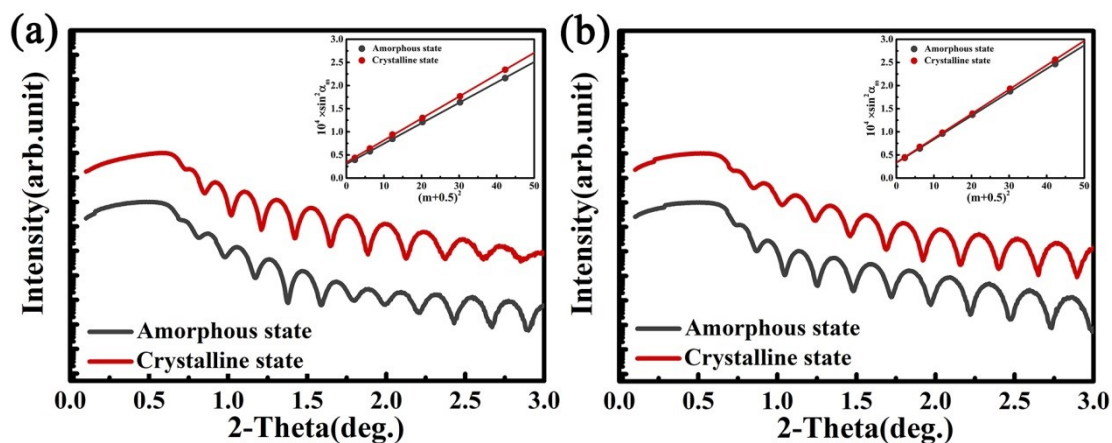

**Figure S9.** XRR patterns for a) GST, b) TaGST films. The insets are the plot of  $\sin^2\theta$  versus  $(m + 0.5)^2$  films.

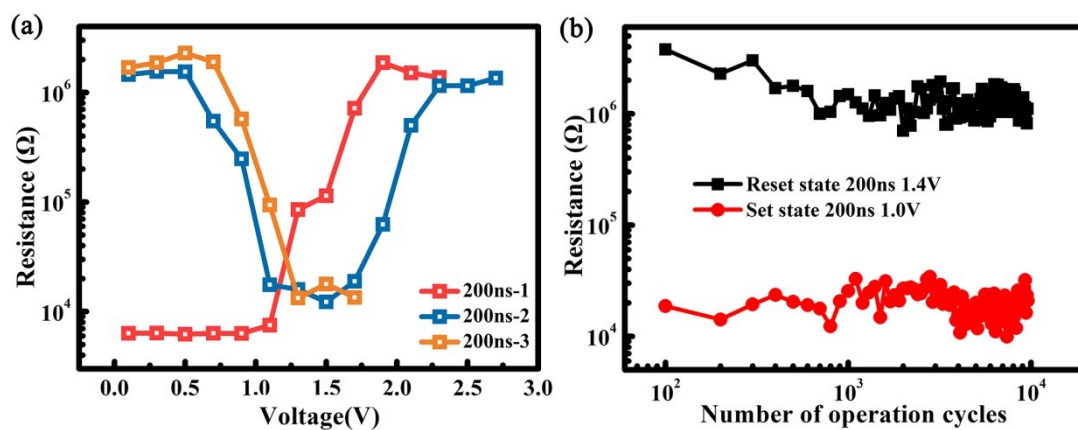

**Figure S10.** (a) The R-V of the sample 1. (b) Endurance of the sample 2.

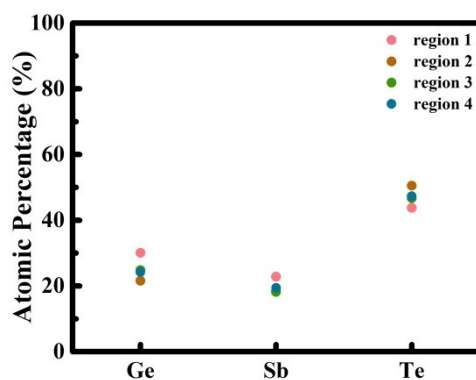

**Figure S11.** The variation tendency of basic element contents for regions 1-4 of the sample 2.
